# Supplementary material
Source: publisher figshare collection journal article supplement (https://gsapubs.figshare.com/ndownloader/files/23320817)
Supplement: Supplementary file 1 [file 23320817]

## Sheet: Appendix 1
EVIDENCE FOR MIXED CONTRIBUTION OF MANTLE, LOWER AND UPPER CRUST TO THE GENESIS OF JURASSIC I-TYPE GRANITES FROM MACAO, SE CHINA
Quelhas et al. (GSA Bulletin)
Appendix 1
Location of analyzed samples
Samples	Area	Latitude	Longitude	Group
T39	Taipa	22,160809	113,562909	MGI HF
T17	Taipa	22,157439	113,543556	MGI HF
T37	Taipa	22,154830	113,560610	MGI HF
T41	Taipa	22,162595	113,564108	MGI HF
T38	Taipa	22,160483	113,562900	MGI HF
T31	Taipa	22,161807	113,544412	MGI HF
M16	Macao Peninsula	22,182528	113,531768	MGI HF
M18	Macao Peninsula	22,183342	113,531582	MGI HF
T44	Taipa	22,159675	113,568718	MGI HF
T28	Taipa	22,163982	113,548960	MGI HF
C70	Coloane	22,128469	113,583146	MGI HF
C71	Coloane	22,126768	113,584221	MGI HF
T51	Taipa	22,161223	113,567083	MGI HF
C57	Coloane	22,127385	113,588193	MGI HF
T50	Taipa	22,164725	11,355708	MGI HF
T33	Taipa	22,164634	113,566793	MGI WMF
T43	Taipa	22,160030	113,568605	MGI WMF
T43R	Taipa	22,160030	113,568605	MGI WMF
T22	Taipa	22,162377	113,551577	MGI WMF
T29	Taipa	22,163812	113,549932	MGI WMF
T35	Taipa	22,162423	113,566327	MGI WMF
T42	Taipa	22,156562	113,567977	MGI WMF
C52	Coloane	22,112117	113,555266	MGI WMF
C58	Coloane	22,12703	113,560318	MGI WMF
C33	Coloane	22,138158	113,576130	MGI WMF
C33R	Coloane	22,138158	113,576130	MGI WMF
C64	Coloane	22,129394	113,572545	MGI WMF
C51	Coloane	22,135277	113,580078	MGI WMF
C60	Coloane	22,119867	113,555112	MGI WMF
C29	Coloane	22,112900	113,572800	MGI WMF
C66	Coloane	22,132108	113,584395	MGI WMF
C47	Coloane	22,130911	113,588969	MGI WMF
C42	Coloane	22,127222	113,562500	MGI WMF
C37	Coloane	22,137057	113,575700	MGI WMF
C63	Coloane	22,123868	113,572722	MGI WMF
C68	Coloane	22,110011	11,355632	MGI WMF
M20	Macao Peninsula	22,196275	113,551672	MGII HF
M31	Macao Peninsula	22,208441	113,548183	MGII HF
M30	Macao Peninsula	22,204091	113,555696	MGII HF
T36	Taipa	22,159890	113,574210	MGII WMF
M29B	Macao Peninsula	22,203229	113,555304	MGII WMF
M35	Macao Peninsula	22,159396	113,546587	MGII WMF
M06	Macao Peninsula	22,188229	113,535322	MGII WMF
M21.B	Macao Peninsula	22,196275	113,551672	MGII WMF
M19	Macao Peninsula	22,193210	113,547353	MGII WMF
M25	Macao Peninsula	22,19919	113,5536	MGII WMF
M34R2	Macao Peninsula	22,211500	113,539,000	MGII WMF
M03	Macao Peninsula	22,211500	113,539000	MGII WMF
M34	Macao Peninsula	22,211500	113,539000	MGII WMF
M34R	Macao Peninsula	22,211500	113,539000	MGII WMF
C72	Coloane	22,126982	113,560433	MGI MG MME
C61A	Coloane	22,11157	113,558377	MGI GD MME
T52	Taipa	22,161689	113,57663	MGII QMD MME
Abbreviations: MGI WMF - Macao Group I weakly to moderately fractionated granites (Zr/Hf > 25); MGI HF - Macao Group I highly fractionated granites (Zr/Hf < 25); MGII WMF - Macao Group II weakly to moderately fractionated granites (Zr/Hf > 25); MGII HF - Macao Group II highly fractionated granites (Zr/Hf < 25); MGI GD MME - Macao Group I granodioritic microgranular mafic enclaves; MGI MG MME - Ma…
Note: the reference coordinate system used is WGS84.
